# Supplementary material for: Generative and interpretable machine learning for aptamer design and analysis of in vitro sequence selection
Source: PubMed Central journal article supplement (PMC9553063; doi:10.1371/journal.pcbi.1010561), 2022-09-29

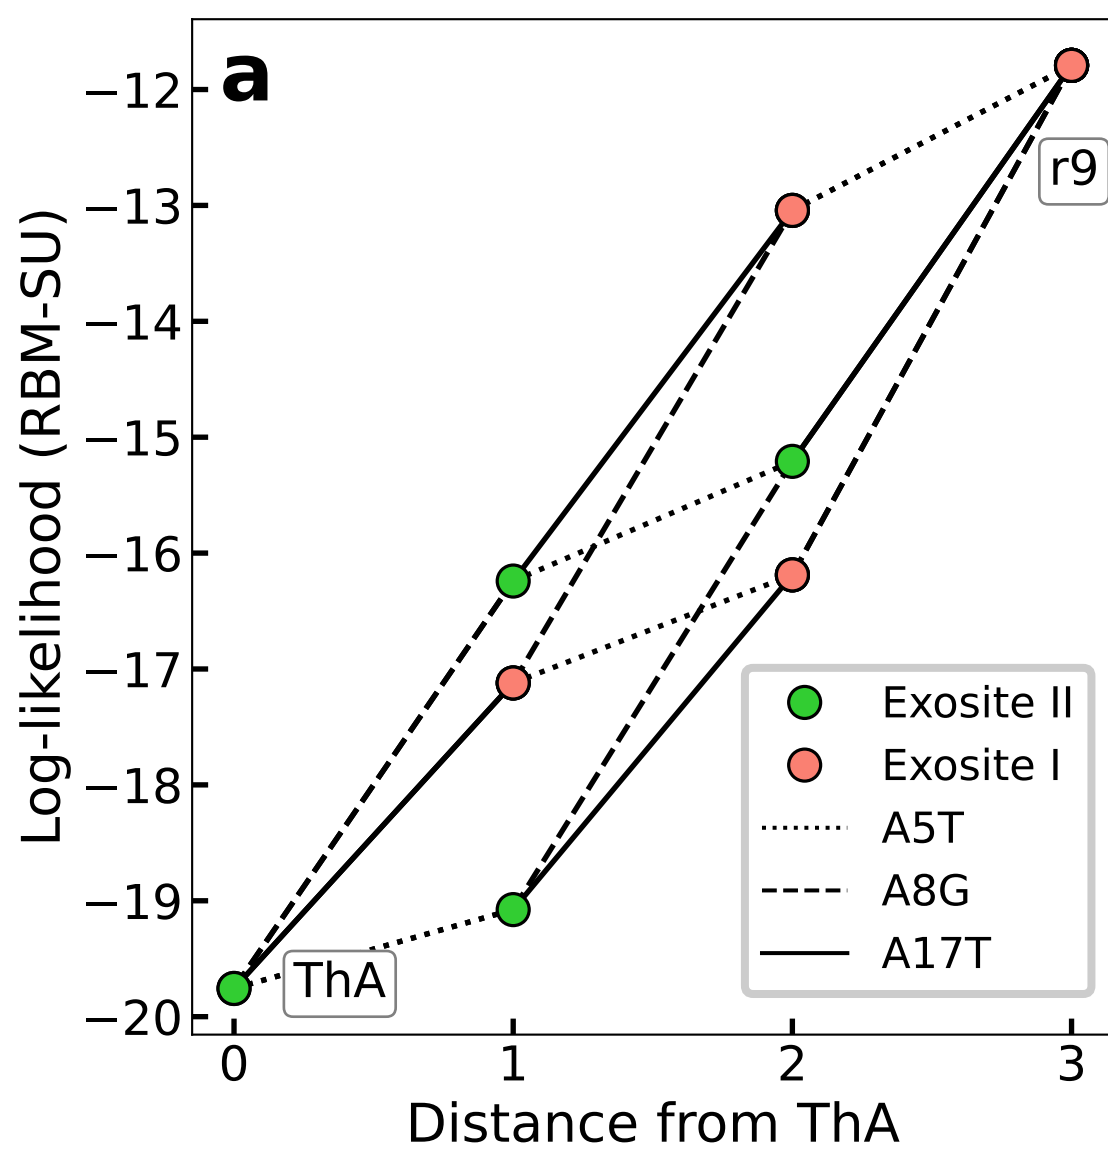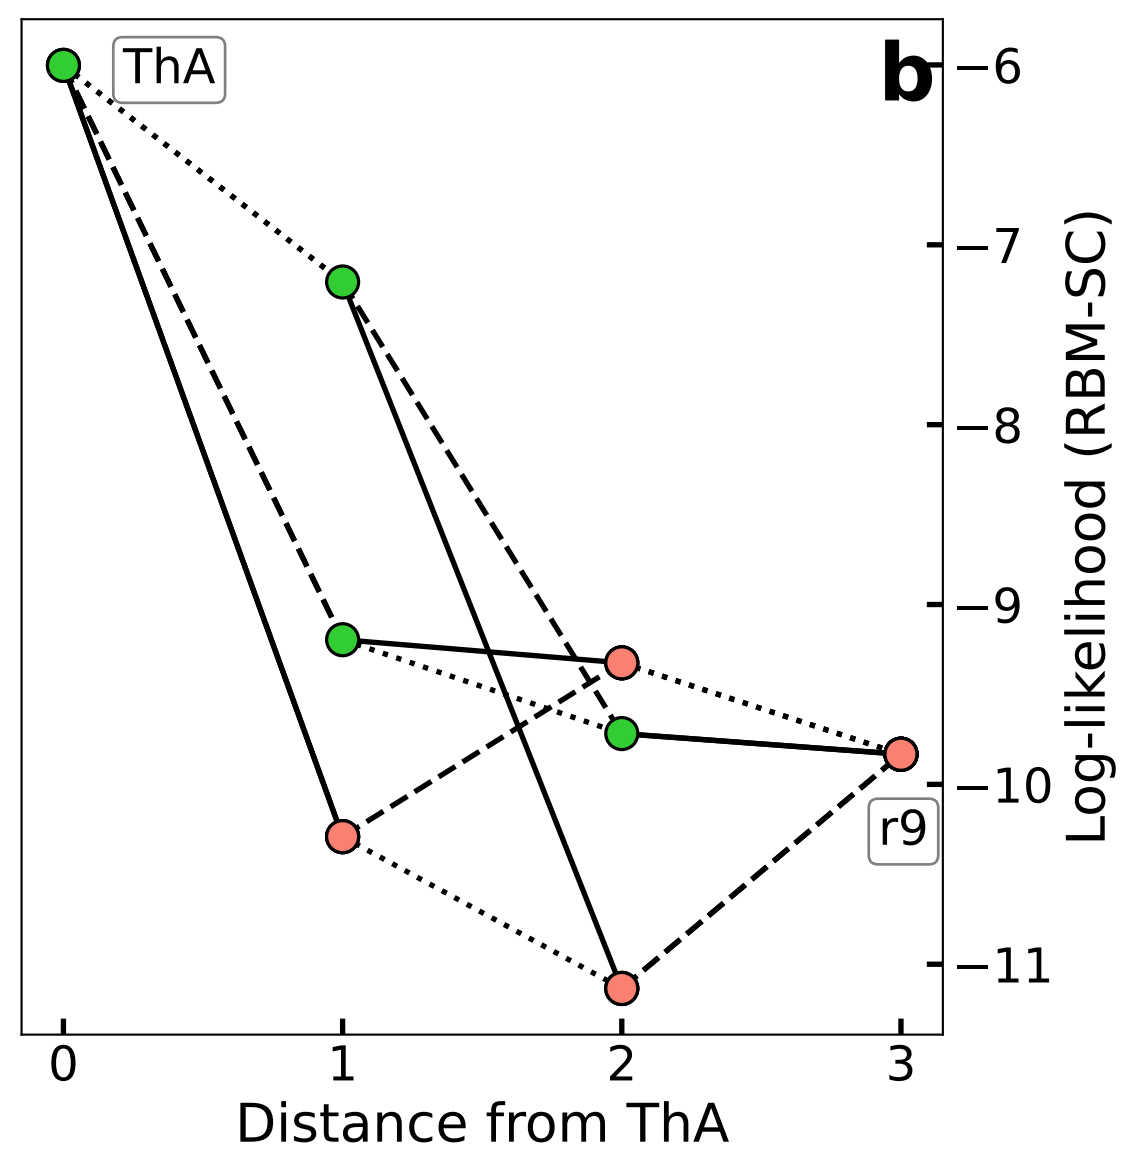

Supplement: pcbi.1010561.s011.pdf [file pcbi.1010561.s011.pdf]
