# Supplementary material for: Generative and interpretable machine learning for aptamer design and analysis of in vitro sequence selection
Source: PubMed Central journal article supplement (PMC9553063; doi:10.1371/journal.pcbi.1010561), 2022-09-29
Supplement: pcbi.1010561.s019.pdf [file pcbi.1010561.s019.pdf]

| Label | Sequence             | Score | Binder Prediction | Experimental result |
|-------|----------------------|-------|-------------------|---------------------|
| d1    | AGGGTAGGTGTGGGGTATGC | 86.92 | B                 | NB                  |
| d2    | AGGGTAGATGTGTAGGATGC | 87.86 | B                 | NB                  |
| d3    | AGGGATGATGGTTGGTAGGC | 84.76 | B                 | NB                  |
| d4    | AGGGATGATGTGGATTAGGC | 86.03 | B                 | NB                  |
| d5    | AGGGTGGGAGCGGGGGACGC | 75.01 | B                 | NB                  |
| d6    | CGGGTAGGTGTGGATTATGC | 77.59 | B                 | NB                  |
| d7    | GTAGGACGGGTAGGGCGGTC | 67.57 | NB                | NB                  |
| d8    | GGGGTTGGGCGGGATGGGC  | 72.15 | B                 | NB                  |
| d9    | GCGGGTTGGGCAGGATCAGC | 44.58 | NB                | NB                  |
| d10   | AGGGATGATGTGTGGTAGGC | N/A   | Cntrl             | Cntrl               |
| d11   | GTAGGATGGGTGGGGTGGGA | 86.46 | B                 | B                   |
| d12   | GTAGGATGGGTAGGGTGGTA | 84.76 | B                 | B                   |
| d13   | CTAGGTTGGGTAGGGTGGTG | 75.01 | B                 | B                   |
| d14   | CTAGCATGGGTAGGGTGGTG | 77.59 | B                 | B                   |
| d15   | GTAGCATGGGTAGGGTGGTC | 65.57 | NB                | NB                  |
| d16   | TTGGGTGGTGTAGGTTGGCG | 72.15 | B                 | B                   |
| d17   | TTGGGTGGTGCAGGTTGCGC | 44.58 | NB                | NB                  |
| d18   | CTAGGATGGGTAGGGTGGTG | N/A   | Cntrl             | Cntrl               |
