# Supplementary material for: Generative and interpretable machine learning for aptamer design and analysis of in vitro sequence selection
Source: PubMed Central journal article supplement (PMC9553063; doi:10.1371/journal.pcbi.1010561), 2022-09-29
Supplement: pcbi.1010561.s020.pdf [file pcbi.1010561.s020.pdf]

|            | Fig 2C (slope) | Fig 2C (Fisher's ratio) | S15 Fig |
|------------|----------------|-------------------------|---------|
| $\beta_5$  | -              | -                       | 0.81    |
| $\beta_6$  | -              | -                       | 1       |
| $\beta_7$  | -              | -                       | 1.07    |
| $\beta_8$  | -              | -                       | 1.13    |
| $\alpha_5$ | 0.16           | 0.14                    | 0.19    |
| $\alpha_6$ | 0.07           | 0.06                    | 0.07    |
| $\alpha_7$ | 0.01           | 0.01                    | 0.05    |
