# Supplementary material for: Generative and interpretable machine learning for aptamer design and analysis of in vitro sequence selection
Source: PubMed Central journal article supplement (PMC9553063; doi:10.1371/journal.pcbi.1010561), 2022-09-29
Supplement: pcbi.1010561.s021.pdf [file pcbi.1010561.s021.pdf]

| Label | counts round 8 | Dist1 | Dist3 | Dist10 | Dist100 |
|-------|----------------|-------|-------|--------|---------|
| r1    | 3              | 0     | 0     | 1      | 1       |
| r2    | 3              | 0     | 0     | 1      | 1       |
| r3    | 0              | 1     | 1     | 1      | 1       |
| r4    | 0              | 1     | 1     | 2      | 2       |
| r5    | 0              | 1     | 1     | 2      | 2       |
| r6    | 242            | 0     | 0     | 0      | 0       |
| r7    | 341            | 0     | 0     | 0      | 0       |
| r8    | 11             | 0     | 0     | 0      | 1       |
| r9    | 9              | 0     | 0     | 1      | 2       |
| r10   | 0              | 1     | 2     | 2      | 3       |
| r11   | 0              | 2     | 2     | 2      | 4       |
| r12   | 0              | 1     | 2     | 3      | 3       |
| r13   | 0              | 2     | 2     | 3      | 5       |
| r14   | 0              | 2     | 2     | 2      | 5       |
| r15   | 0              | 2     | 2     | 2      | 4       |
| r16   | 0              | 1     | 2     | 2      | 3       |
| r17   | 0              | 1     | 2     | 3      | 4       |
| r18   | 528            | 0     | 0     | 0      | 0       |
| r19   | 139            | 0     | 0     | 0      | 0       |
| r20   | 10             | 0     | 0     | 0      | 1       |
| r21   | 8              | 0     | 0     | 1      | 2       |
| r22   | 0              | 2     | 2     | 2      | 2       |
| r23   | 0              | 1     | 1     | 2      | 4       |
| r24   | 0              | 1     | 1     | 1      | 3       |
| r25   | 0              | 1     | 1     | 2      | 3       |
| r26   | 0              | 1     | 3     | 3      | 4       |
| r27   | 0              | 1     | 1     | 1      | 3       |
