# Supplementary material for: Generative and interpretable machine learning for aptamer design and analysis of in vitro sequence selection
Source: PubMed Central journal article supplement (PMC9553063; doi:10.1371/journal.pcbi.1010561), 2022-09-29
Supplement: pcbi.1010561.s022.pdf [file pcbi.1010561.s022.pdf]

| Sample Name | Full Reported Sequence                                                                  |
|-------------|-----------------------------------------------------------------------------------------|
| r1          | CTCGAGAGTTGCAGAAGTAGTGTATGATGTGTGGTAGGCACCTTCTGCAACTCTCGAG                              |
| r2          | CTCGAGAGTTGCAGAAGTAGTGTAGGTGTGGATGATGCACTTCTGCAACTCTCGAG                                |
| r3          | CTCGAGAGTTGCAGAAGTAGGTTTTGGGTAGCGTGGTACTTCTGCAACTCTCGAG                                 |
| r4          | CTCGAGAGTTGCAGAAGTAGGGATGATGTCTGGCAGGAACCTTCTGCAACTCTCGAG                               |
| r5          | CTCGAGAGTTGCAGAAGTCTAGGACGGGTAGGGCGGGTACTTCTGCAACTCTCGAG                                |
| r6          | CTCGAGAGTTGCAGAAGTAGGGATCTGTGTGGTAGGCTACTTCTGCAACTCTCGAG                                |
| r7          | CTCGAGAGTTGCAGAAGTAGGGATGCTGCGTGGTAGGCACCTTCTGCAACTCTCGAG                               |
| r8          | CTCGAGAGTTGCAGAAGTAGGGGTGGTGTGGTGGCAACTTCTGCAACTCTCGAG                                  |
| r9          | CTCGAGAGTTGCAGAAGTAGGGTGGTGTGGTGGTGGCACTTCTGCAACTCTCGAG                                 |
| r10         | CTCGAGAGTTGCAGAAGTAGGTTGGTTTATGGTTGGCACTTCTGCAACTCTCGAG                                 |
| r11         | CTCGAGAGTTGCAGAAGTAGAGGGTGGTCAGGGTGGGAACCTTCTGCAACTCTCGAG                               |
| r12         | CTCGAGAGTTGCAGAAGTAGAGGGTGGGTGGGTGGGAACCTTCTGCAACTCTCGAG                                |
| r13         | CTCGAGAGTTGCAGAAGTAGGGGTGGTACAGGGTGGCACTTCTGCAACTCTCGAG                                 |
| r14         | CTCGAGAGTTGCAGAAGTAGATGGGCAGGTGGTGGCACTTCTGCAACTCTCGAG                                  |
| r15         | CTCGAGAGTTGCAGAAGTAGATGGGTGGGTAGGGTGGCACTTCTGCAACTCTCGAG                                |
| r16         | CTCGAGAGTTGCAGAAGTAGAGGGTGGGTGGGTGGGTAACTTCTGCAACTCTCGAG                                |
| r17         | CTCGAGAGTTGCAGAAGTAGGGTGGTGGTGGTGGTGGTAACTTCTGCAACTCTCGAG                               |
| r18         | CTCGAGAGTTGCAGAAGTAGGGATGGGATGGTAGGGCACTTCTGCAACTCTCGAG                                 |
| r19         | CTCGAGAGTTGCAGAAGTAGGGTGGTATGTGGTGGTAACTTCTGCAACTCTCGAG                                 |
| r20         | CTCGAGAGTTGCAGAAGTAGGGTGGGTAGGGTGGTAACTTCTGCAACTCTCGAG                                  |
| r21         | CTCGAGAGTTGCAGAAGTAAACGGTGGTGGTGGTGGTAACTTCTGCAACTCTCGAG                                |
| r22         | CTCGAGAGTTGCAGAAGTCGGGTGGTGGTGGTGGGAGACTTCTGCAACTCTCGAG                                 |
| r23         | CTCGAGAGTTGCAGAAGTATTGGTTGGATAGGTTGGTAACTTCTGCAACTCTCGAG                                |
| r24         | CTCGAGAGTTGCAGAAGTAGGGTGGGTGGTGGTGGTAACTTCTGCAACTCTCGAG                                 |
| r25         | CTCGAGAGTTGCAGAAGTCGGGTGGGTGGGTGGGATTAACTTCTGCAACTCTCGAG                                |
| r26         | CTCGAGAGTTGCAGAAGTCGGTGGGGGGTGGATACACTTCTGCAACTCTCGAG                                   |
| r27         | CTCGAGAGTTGCAGAAGTCTGGGTGGTGGTGGTAACTTCTGCAACTCTCGAG                                    |
| ThA         | CTCGAGAGTTGCAGAAGTAGGGATGATGTGTGGTAGGCACCTTCTGCAACTCTCGAG                               |
| ThD         | CTCGAGAGTTGCAGAAGTAGGATGGGTAGGGTGGTCACTTCTGCAACTCTCGAG                                  |
| p1          | CTCGAGAGTTGCAGAAGTAGGGATGATGTGTGGTGGCACTTCTGCAACTCTCGAG                                 |
| p2          | CTCGAGAGTTGCAGAAGTAGGGATGGTGTGTGGTAGGCACCTTCTGCAACTCTCGAG                               |
| p3          | CTCGAGAGTTGCAGAAGTAGGGTGTATGTGTGGTAGGCACCTTCTGCAACTCTCGAG                               |
| p4          | CTCGAGAGTTGCAGAAGTAGGGATGGTGTGTGGTGGCACTTCTGCAACTCTCGAG                                 |
| p5          | CTCGAGAGTTGCAGAAGTAGGGTGTATGTGTGGTGGCACTTCTGCAACTCTCGAG                                 |
| p6          | CTCGAGAGTTGCAGAAGTAGGGTGGTGTGTGGTAGGCACCTTCTGCAACTCTCGAG                                |
| d1          | TCAGGCTCTCGAGAGTTGCAGAAGTAGGGTAGGTGTGGGGTATGCACTTCTGCCTGCATCGAGACA                      |
| d2          | TCAGGCTCTCGAGAGTTGCAGAAGTAGGGTAGATGTGTAGGATGCACTTCTGCCTGCATCGAGACA                      |
| d3          | TCAGGCTCTCGAGAGTTGCAGAAGTAGGGATGATGGTTGGTAGGCACCTTCTGCCTGCATCGAGACA                     |
| d4          | TCAGGCTCTCGAGAGTTGCAGAAGTAGGGATGATGTGGATTAGGCACCTTCTGCCTGCATCGAGACA                     |
| d5          | TCAGGCTCTCGAGAGTTGCAGAAGTAGGGTGGGAGCGGGGACGCACTTCTGCCTGCATCGAGACA                       |
| d6          | TCAGGCTCTCGAGAGTTGCAGAAGTCGGGTAGGTGTGGATTATGCACTTCTGCCTGCATCGAGACA                      |
| d7          | TCAGGCTCTCGAGAGTTGCAGAAGTGTAGGACGGGTAGGGCGGTCACTTCTGCCTGCATCGAGACA                      |
| d8          | TCAGGCTCTCGAGAGTTGCAGAAGTGGGGTGGGGTGGGGATGGGCACCTTCTGCCTGCATCGAGACA                     |
| d9          | TCAGGCTCTCGAGAGTTGCAGAAGTGGGGTGGGGATGGGCACCTTCTGCCTGCATCGAGACA                          |
| d10         | TCAGGCTCTCGAGAGTTGCAG AAGTAGGGATGATGTGTGGTAGGCACCTTCTGCCTGCATCGAGACA                    |
| d11         | /5PHOS/CCAGTTTTTCTGGTGAGCTAGTGCAGACATGATCCTAGGATGGGTGGGGTGGGAGATCATGTAACCTCCTAGCTGCCTGA |
| d12         | /5PHOS/CCAGTTTTTCTGGTGAGCTAGTGCAGACATGATCCTAGGATGGGTGGGGTGGGAGATCATGTAACCTCCTAGCTGCCTGA |
| d13         | /5PHOS/CCAGTTTTTCTGGTGAGCTAGTGCAGACATGATCCTAGGTTGGGTAGGGTGGTGGATCATGTAACCTCCTAGCTGCCTGA |
| d14         | /5PHOS/CCAGTTTTTCTGGTGAGCTAGTGCAGACATGATCCTAGCATGGGTAGGGTGGTGGATCATGTAACCTCCTAGCTGCCTGA |
| d15         | /5PHOS/CCAGTTTTTCTGGTGAGCTAGTGCAGACATGATCCTAGCATGGGTAGGGTGGTGGATCATGTAACCTCCTAGCTGCCTGA |
| d16         | /5PHOS/CCAGTTTTTCTGGTGAGCTAGTGCAGACATGATCTGGGTGGTGGTGGTGGGATCATGTAACCTCCTAGCTGCCTGA     |
| d17         | /5PHOS/CCAGTTTTTCTGGTGAGCTAGTGCAGACATGATCTGGGTGGTGGTGGTGGGATCATGTAACCTCCTAGCTGCCTGA     |
| d18         | /5PHOS/CCAGTTTTTCTGGTGAGCTAGTGCAGACATGATCCTAGGATGGGTAGGGTGGTGGATCATGTAACCTCCTAGCTGCCTGA |
